# Supplementary material for: Gene and Protein Expression Profiles in a Mouse Model of Collagen-Induced Arthritis
Source: PubMed Central journal article supplement — Int J Med Sci. 2018 Jan 1;15(1):77–85. doi: 10.7150/ijms.22345 (PMC5765742; doi:10.7150/ijms.22345), 2018-01-01
Supplement: ijmsv15p0077s1.pdf [file ijmsv15p0077s1.pdf]

**Table S1.** Original data from the RNA microarray

## (A) Upregulated genes (50 genes)

| Gene symbol      | Relative fold change | CIA/Control (volume) | Control signal | CIA signal | Gene symbol     | Relative fold change | CIA/Control (volume) | Control signal | CIA signal |
|------------------|----------------------|----------------------|----------------|------------|-----------------|----------------------|----------------------|----------------|------------|
| <i>Irf7</i>      | <b>24.7</b>          | 6.0                  | 8.8            | 4.1        | <i>Olfr1386</i> | <b>2.2</b>           | 1.7                  | 1.2            | 2.3        |
| <i>Isg15</i>     | <b>6.6</b>           | 5.0                  | 6.6            | 3.8        | <i>Olfr1502</i> | <b>2.2</b>           | 2.5                  | 2.0            | 3.1        |
| <i>Ifit1</i>     | <b>6.1</b>           | 4.2                  | 5.7            | 3.1        | <i>Cyp2d26</i>  | <b>2.2</b>           | 2.1                  | 2.7            | 1.6        |
| <i>Oas3</i>      | <b>4.9</b>           | 4.5                  | 5.8            | 3.5        | <i>Mir423</i>   | <b>2.2</b>           | 2.6                  | 2.1            | 3.2        |
| <i>Mir107</i>    | <b>4.2</b>           | 3.0                  | 2.2            | 4.2        | <i>Ppp1r15a</i> | <b>2.2</b>           | 3.9                  | 4.5            | 3.4        |
| <i>H2-Q8</i>     | <b>3.4</b>           | 3.2                  | 4.2            | 2.4        | <i>Spta1</i>    | <b>2.2</b>           | 8.7                  | 9.2            | 8.1        |
| <i>Fn1</i>       | <b>3.2</b>           | 5.0                  | 4.3            | 5.9        | <i>Rps15</i>    | <b>2.2</b>           | 2.7                  | 2.2            | 3.3        |
| <i>C1ra</i>      | <b>3.0</b>           | 2.7                  | 3.6            | 2.0        | <i>Vwf</i>      | <b>2.2</b>           | 7.0                  | 6.4            | 7.5        |
| <i>Ifih1</i>     | <b>2.9</b>           | 2.9                  | 3.8            | 2.2        | <i>Pla2g2a</i>  | <b>2.2</b>           | 3.5                  | 3.0            | 4.1        |
| <i>Fpr2</i>      | <b>2.9</b>           | 2.5                  | 3.4            | 1.9        | <i>Cmpk2</i>    | <b>2.1</b>           | 4.4                  | 4.9            | 3.8        |
| <i>Clca3a1</i>   | <b>2.7</b>           | 4.0                  | 3.4            | 4.8        | <i>F5</i>       | <b>2.1</b>           | 7.5                  | 8.1            | 7.0        |
| <i>Olfr774</i>   | <b>2.7</b>           | 1.3                  | 0.8            | 2.2        | <i>Fos</i>      | <b>2.1</b>           | 5.0                  | 4.6            | 5.6        |
| <i>Hist1h2bj</i> | <b>2.7</b>           | 3.6                  | 3.0            | 4.4        | <i>Olfr917</i>  | <b>2.1</b>           | 2.5                  | 3.1            | 2.0        |
| <i>Ifi204</i>    | <b>2.6</b>           | 1.7                  | 2.5            | 1.2        | <i>Ptpn11</i>   | <b>2.0</b>           | 6.3                  | 5.8            | 6.9        |
| <i>Fads2</i>     | <b>2.6</b>           | 3.9                  | 3.3            | 4.6        | <i>C3</i>       | <b>2.0</b>           | 4.9                  | 4.4            | 5.4        |
| <i>Plxna4</i>    | <b>2.5</b>           | 4.5                  | 5.2            | 3.9        | <i>Hist2h4</i>  | <b>2.0</b>           | 2.8                  | 2.4            | 3.4        |
| <i>Sp100</i>     | <b>2.5</b>           | 6.8                  | 7.5            | 6.2        | <i>Flna</i>     | <b>2.0</b>           | 7.2                  | 6.7            | 7.7        |
| <i>Vcl</i>       | <b>2.3</b>           | 7.6                  | 7.1            | 8.3        | <i>Cks1b</i>    | <b>2.0</b>           | 2.9                  | 2.4            | 3.5        |
| <i>Tuba3b</i>    | <b>2.3</b>           | 3.5                  | 4.1            | 2.9        | <i>Olfr1057</i> | <b>2.0</b>           | 2.0                  | 2.5            | 1.5        |
| <i>Dusp3</i>     | <b>2.3</b>           | 4.9                  | 4.3            | 5.5        | <i>Olfr726</i>  | <b>2.0</b>           | 1.7                  | 1.2            | 2.3        |
| <i>Hist1h2aa</i> | <b>2.3</b>           | 5.0                  | 4.4            | 5.6        | <i>Olfr1298</i> | <b>2.0</b>           | 2.2                  | 1.7            | 2.7        |
| <i>H2-T24</i>    | <b>2.3</b>           | 6.2                  | 6.8            | 5.6        | <i>Igtp</i>     | <b>2.0</b>           | 5.8                  | 6.3            | 5.3        |
| <i>Rps6ka2</i>   | <b>2.3</b>           | 3.2                  | 2.7            | 3.9        | <i>Mir7-1</i>   | <b>2.0</b>           | 2.4                  | 2.0            | 3.0        |
| <i>Itga2</i>     | <b>2.3</b>           | 5.6                  | 5.0            | 6.2        | <i>Thbs1</i>    | <b>2.0</b>           | 8.8                  | 8.3            | 9.3        |
| <i>Sort1</i>     | <b>2.2</b>           | 6.0                  | 5.5            | 6.6        | <i>Olfr38</i>   | <b>2.0</b>           | 2.5                  | 2.0            | 3.1        |

## (B) Downregulated genes (48 genes)

| Gene symbol       | Relative fold change | CIA/Control (volume) | Control signal | CIA signal | Gene symbol     | Relative fold change | CIA/Control (volume) | Control signal | CIA signal |
|-------------------|----------------------|----------------------|----------------|------------|-----------------|----------------------|----------------------|----------------|------------|
| <i>Sec24a</i>     | <b>-3.9</b>          | 5.8                  | 4.9            | 6.8        | <i>Rps2</i>     | <b>-2.2</b>          | 3.6                  | 4.2            | 3.1        |
| <i>Cd27</i>       | <b>-3.3</b>          | 3.2                  | 2.5            | 4.2        | <i>Il7r</i>     | <b>-2.2</b>          | 5.4                  | 4.9            | 6.0        |
| <i>Cd8b1</i>      | <b>-3.3</b>          | 5.4                  | 4.6            | 6.3        | <i>Cnd2</i>     | <b>-2.2</b>          | 3.8                  | 3.3            | 4.4        |
| <i>Ccl5</i>       | <b>-3.2</b>          | 6.1                  | 5.3            | 7.0        | <i>Rgs14</i>    | <b>-2.2</b>          | 3.4                  | 2.9            | 4.0        |
| <i>Cd3g</i>       | <b>-3.2</b>          | 5.2                  | 4.4            | 6.1        | <i>Pck2</i>     | <b>-2.2</b>          | 5.7                  | 6.3            | 5.2        |
| <i>Cd3e</i>       | <b>-2.9</b>          | 7.3                  | 6.6            | 8.1        | <i>Cd59a</i>    | <b>-2.2</b>          | 7.6                  | 8.2            | 7.1        |
| <i>Lat</i>        | <b>-2.7</b>          | 3.9                  | 3.3            | 4.7        | <i>Tcf7</i>     | <b>-2.2</b>          | 6.5                  | 6.0            | 7.1        |
| <i>Hist1h2ba</i>  | <b>-2.7</b>          | 0.8                  | 1.8            | 0.4        | <i>Rps11</i>    | <b>-2.2</b>          | 4.3                  | 3.8            | 4.9        |
| <i>Ncr1</i>       | <b>-2.7</b>          | 3.0                  | 2.4            | 3.8        | <i>Ugcg</i>     | <b>-2.1</b>          | 3.8                  | 3.3            | 4.4        |
| <i>Eif4a1</i>     | <b>-2.6</b>          | 10.0                 | 9.3            | 10.7       | <i>Rpl6</i>     | <b>-2.1</b>          | 6.4                  | 5.9            | 7.0        |
| <i>Rps8</i>       | <b>-2.6</b>          | 4.0                  | 4.8            | 3.4        | <i>Olf373</i>   | <b>-2.1</b>          | 2.4                  | 3.0            | 2.0        |
| <i>Cd4</i>        | <b>-2.6</b>          | 4.0                  | 3.4            | 4.8        | <i>Olf705</i>   | <b>-2.1</b>          | 2.9                  | 3.4            | 2.4        |
| <i>Il2rb</i>      | <b>-2.5</b>          | 3.9                  | 3.3            | 4.7        | <i>Cd209a</i>   | <b>-2.1</b>          | 3.2                  | 2.7            | 3.8        |
| <i>Ddx5</i>       | <b>-2.5</b>          | 7.4                  | 6.7            | 8.1        | <i>Lck</i>      | <b>-2.1</b>          | 4.0                  | 3.5            | 4.6        |
| <i>Rpl30</i>      | <b>-2.5</b>          | 2.2                  | 2.9            | 1.6        | <i>Klrd1</i>    | <b>-2.1</b>          | 2.9                  | 2.4            | 3.4        |
| <i>Mirlet7f-2</i> | <b>-2.5</b>          | 1.4                  | 2.2            | 0.9        | <i>Olf1501</i>  | <b>-2.1</b>          | 2.5                  | 3.1            | 2.1        |
| <i>Ppp2r2d</i>    | <b>-2.5</b>          | 3.4                  | 4.1            | 2.8        | <i>Rpl37a</i>   | <b>-2.1</b>          | 2.1                  | 1.7            | 2.7        |
| <i>Atp1b3</i>     | <b>-2.4</b>          | 5.4                  | 4.8            | 6.1        | <i>Mir103-2</i> | <b>-2.0</b>          | 1.5                  | 2.1            | 1.1        |
| <i>Ube3c</i>      | <b>-2.4</b>          | 3.3                  | 2.7            | 4.0        | <i>Ppil2</i>    | <b>-2.0</b>          | 5.3                  | 4.8            | 5.8        |
| <i>Olf875</i>     | <b>-2.4</b>          | 2.2                  | 2.9            | 1.7        | <i>Ddx46</i>    | <b>-2.0</b>          | 3.8                  | 3.3            | 4.3        |
| <i>Rmrp</i>       | <b>-2.3</b>          | 8.1                  | 7.5            | 8.7        | <i>Stat4</i>    | <b>-2.0</b>          | 4.5                  | 4.0            | 5.1        |
| <i>Ctsw</i>       | <b>-2.3</b>          | 3.5                  | 2.9            | 4.1        | <i>Itgb7</i>    | <b>-2.0</b>          | 4.3                  | 3.9            | 4.9        |
| <i>Slc40a1</i>    | <b>-2.3</b>          | 3.7                  | 3.1            | 4.3        | <i>Bcl2a1c</i>  | <b>-2.0</b>          | 2.6                  | 2.1            | 3.1        |
| <i>Sec61b</i>     | <b>-2.2</b>          | 2.1                  | 2.7            | 1.6        | <i>Olf1299</i>  | <b>-2.0</b>          | 2.5                  | 3.1            | 2.0        |

**Table S2.** Original data from the proteome array

## (A) Classification of upregulated proteins

| No. | Classification                            | Identified proteins                                                                                                                                                                                                                                        | Number of proteins |
|-----|-------------------------------------------|------------------------------------------------------------------------------------------------------------------------------------------------------------------------------------------------------------------------------------------------------------|--------------------|
| 1   | Cytokine-cytokine receptor interaction    | IL-2, IL-27, IL-17, MIP-1beta, IL-23, IL-1beta, IL-1ra, MIP-2, MCP-5, TARC, IL-3, TNF-alpha, IP-10, MIG, BLC, I-TAC, RANTES, IL-4, IL-6, IL-5, IL-10, IL-7, JE, GM-CSF, SDF-1, MIP-1alpha, G-CSF, IL-1alpha, M-CSF, IL-13, I-309, IFN-gamma, KC, IL-12 p70 | 34                 |
| 2   | IL-17 signaling pathway                   | IL-27, IL-17, IL-1beta, MIP-2, MCP-5, TARC, TNF-alpha, IP-10, IL-4, IL-6, IL-5, JE, GM-CSF, G-CSF, IL-13, Eotaxin, IFN-gamma, KC                                                                                                                           | 18                 |
| 3   | Rheumatoid arthritis                      | IL-17, IL-23, IL-1beta, MCP-5, TNF-alpha, RANTES, IL-6, IL-16, JE, GM-CSF, SDF-1, MIP-1alpha, IL-1alpha, M-CSF, IFN-gamma, sICAM-1                                                                                                                         | 15                 |
| 4   | Jak-STAT signaling pathway                | IL-2, IL-27, IL-23, IL-3, IL-4, IL-6, IL-5, IL-10, IL-7, GM-CSF, G-CSF, IL-13, IFN-gamma, IL-12 p70                                                                                                                                                        | 14                 |
| 5   | Hematopoietic cell lineage                | IL-1beta, IL-1ra, IL-3, TNF-alpha, IL-4, IL-6, IL-5, IL-7, GM-CSF, G-CSF, IL-1alpha, M-CSF                                                                                                                                                                 | 12                 |
| 6   | Th17 cell differentiation                 | IL-2, IL-27, IL-17, IL-23, IL-1beta, IL-1ra, IL-4, IL-6, IFN-gamma                                                                                                                                                                                         | 9                  |
| 7   | NOD-like receptor signaling pathway       | IL-1beta, MIP-2, MCP-5, TNF-alpha, RANTES, IL-6, JE, KC                                                                                                                                                                                                    | 8                  |
| 8   | Graft-versus-host disease                 | IL-2, IL-1beta, TNF-alpha, IL-6, IL-10, IL-1alpha, IL-13, IFN-gamma                                                                                                                                                                                        | 8                  |
| 9   | NF-kappa B signaling pathway              | MIP-1beta, IL-1beta, IL-1ra, TNF-alpha, BLC, SDF-1, sICAM-1                                                                                                                                                                                                | 7                  |
| 10  | T cell receptor signaling pathway         | IL-2, TNF-alpha, IL-4, IL-5, IL-10, GM-CSF, IFN-gamma                                                                                                                                                                                                      | 7                  |
| 11  | PI3K-Akt signaling pathway                | IL-2, IL-3, IL-4, IL-6, IL-7, G-CSF, M-CSF                                                                                                                                                                                                                 | 7                  |
| 12  | Osteoclast differentiation                | IL-1beta, IL-1ra, TREM-1, TNF-alpha, IL-1alpha, M-CSF, IFN-gamma                                                                                                                                                                                           | 7                  |
| 13  | Th1 and Th2 cell differentiation          | IL-2, IL-4, IL-5, IL-13, IFN-gamma, IL-12 p70                                                                                                                                                                                                              | 6                  |
| 14  | MAPK signaling pathway                    | IL-1beta, IL-1ra, TNF-alpha, IL-1alpha                                                                                                                                                                                                                     | 4                  |
| 15  | Systemic lupus erythematosus              | TNF-alpha, IL-10, C5/C5a, IFN-gamma                                                                                                                                                                                                                        | 4                  |
| 16  | Natural killer cell mediated cytotoxicity | TNF-alpha, GM-CSF, IFN-gamma, sICAM-1                                                                                                                                                                                                                      | 4                  |
| 17  | HIF-1 signaling pathway                   | TIMP-1, IL-6, IFN-gamma                                                                                                                                                                                                                                    | 3                  |
| 18  | RIG-I-like receptor signaling pathway     | TNF-alpha, IP-10, IL-12 p70                                                                                                                                                                                                                                | 3                  |
| 19  | Apoptosis                                 | IL-3, TNF-alpha                                                                                                                                                                                                                                            | 2                  |
| 20  | Antigen processing and presentation       | TNF-alpha, IFN-gamma                                                                                                                                                                                                                                       | 2                  |

## (B) Densitometry analysis of upregulated proteins (n = 40)

| No. | Protein name | Control spot density | CIA spot density | Relative fold change | No. | Protein name         | Control spot density | CIA spot density | Relative fold change |
|-----|--------------|----------------------|------------------|----------------------|-----|----------------------|----------------------|------------------|----------------------|
| 1   | IL-2         | 550                  | 15971            | 27.4                 | 23  | IL-5                 | 6747                 | 15515            | 2.2                  |
| 2   | IL-27        | 450                  | 9235             | 19.3                 | 24  | IL-10                | 9305                 | 19774            | 2.0                  |
| 3   | IL-17        | 880                  | 12208            | 13.1                 | 25  | IL-7                 | 10405                | 21081            | 1.9                  |
| 4   | MIP-1beta    | 1913                 | 20771            | 10.2                 | 26  | JE                   | 9935                 | 19448            | 1.9                  |
| 5   | IL-23        | 1161                 | 8873             | 7.2                  | 27  | GM-CSF               | 11643                | 21716            | 1.8                  |
| 6   | IL-1beta     | 1811                 | 12301            | 6.4                  | 28  | SDF-1                | 14223                | 25706            | 1.7                  |
| 7   | IL-1ra       | 2146                 | 10467            | 4.6                  | 29  | MIP-1alpha           | 15175                | 26549            | 1.7                  |
| 8   | MIP-2        | 2560                 | 11417            | 4.2                  | 30  | G-CSF                | 10145                | 17690            | 1.6                  |
| 9   | MCP-5        | 4142                 | 18185            | 4.1                  | 31  | IL-1alpha            | 11437                | 19036            | 1.6                  |
| 10  | TIMP-1       | 4025                 | 17009            | 4.0                  | 32  | M-CSF                | 11457                | 18818            | 1.6                  |
| 11  | TARC         | 3683                 | 15287            | 3.9                  | 33  | IL-13                | 15410                | 24395            | 1.5                  |
| 12  | IL-3         | 4460                 | 18221            | 3.9                  | 34  | I-309                | 14950                | 23210            | 1.5                  |
| 13  | TREM-1       | 4330                 | 17234            | 3.8                  | 35  | Eotaxin              | 15719                | 23281            | 1.4                  |
| 14  | TNF-alpha    | 5317                 | 18919            | 3.4                  | 36  | C5/C5a               | 19829                | 29113            | 1.4                  |
| 15  | IP-10        | 6042                 | 18646            | 2.9                  | 37  | IFN-gamma            | 15739                | 22867            | 1.4                  |
| 16  | MIG          | 7637                 | 23542            | 2.9                  | 38  | KC                   | 18774                | 27158            | 1.4                  |
| 17  | BLC          | 6288                 | 18202            | 2.7                  | 39  | sICAM-1              | 23704                | 33994            | 1.4                  |
| 18  | I-TAC        | 7651                 | 20452            | 2.5                  | 40  | IL-12 p70            | 21073                | 25226            | 1.1                  |
| 19  | RANTES       | 2697                 | 7186             | 2.5                  | 41  | Reference Spot 23661 |                      | 25510            | 1.0                  |
| 20  | IL-4         | 6771                 | 17471            | 2.4                  | 42  | Reference Spot 23744 |                      | 25265            | 1.0                  |
| 21  | IL-6         | 7731                 | 19787            | 2.4                  | 43  | Reference Spot 23718 |                      | 24659            | 1.0                  |
| 22  | IL-16        | 9176                 | 21125            | 2.2                  | 44  | NC                   | 1                    | 1                | 0.9                  |
